# Supplementary material
Source: Royal Society of Chemistry journal article supplement (doi:10.1039/d5dd00452g)
Supplement: d5dd00452g1.xlsx [file d5dd00452g1.xlsx]

## Sheet: Enzymatic
NAME	UNID	EC
Aldo-keto reductase MSMEG_2407/MSMEI_2346	A0QV09	1.1.1.-
2-dehydropantoate 2-reductase	P0A9J4	1.1.1.169
Ser/Thr kinase CK2	J9VNH4	1.10.510.10
Dihydrofolate reductase	Q81R22	1.5.1.3
Saccharopine dehydrogenase [NAD(+), L-lysine-forming]	P38998	1.5.1.7
Protein arginine N-methyltransferase SFM1	Q12314	2.1.1.-
Ribosomal RNA small subunit methyltransferase A	P37468	2.1.1.182
rRNA adenine N-6-methyltransferase	P13956	2.1.1.184
Histone-lysine N-methyltransferase NSD3	Q9BZ95	2.1.1.370
mRNA cap guanine-N7 methyltransferase	Q8SR66	2.1.1.56
Catechol O-methyltransferase	P22734	2.1.1.6
Histamine N-methyltransferase	P50135	2.1.1.8
Beta-ketoacyl-[acyl-carrier-protein] synthase III	P0A6R2	2.3.1.180
NAD-dependent protein deacetylase sirtuin-3, mitochondrial	Q9NTG7	2.3.1.286
Histone acetyltransferase KAT8	Q9H7Z6	2.3.1.48
Aminoglycoside N(3)-acetyltransferase	Q47030	2.3.1.81
Aminoglycoside N(3)-acetyltransferase	C4NV15	2.3.1.81
SUMO-conjugating enzyme UBC9	P63279	2.3.2.-
Ubiquitin-conjugating enzyme E2 T	Q9NPD8	2.3.2.23
E3 ubiquitin-protein ligase Mdm2	Q00987	2.3.2.27
E3 ubiquitin-protein ligase RNF146	Q9NTX7	2.3.2.27
Purine nucleoside phosphorylase DeoD-type	P0ABP8	2.4.2.1
Poly [ADP-ribose] polymerase 1	P09874	2.4.2.30
Putative secreted protein	C9Z6T8	2.4.2.30
Lipopolysaccharide heptosyltransferase 1	P24173	2.4.99.23
2-dehydro-3-deoxyphosphooctonate aldolase	P0A715	2.5.1.55
4,4'-diapophytoene synthase	A9JQL9	2.5.1.96
4-diphosphocytidyl-2-C-methyl-D-erythritol kinase	O67060	2.7.1.148
APH(2'')-Id	O68183	2.7.1.67
Shikimate kinase	P56073	2.7.1.71
Insulin-like growth factor 1 receptor	P08069	2.7.10.1
Epidermal growth factor receptor	P00533	2.7.10.1
Tyrosine-protein kinase HCK	P08631	2.7.10.2
Tyrosine-protein kinase ABL1	P00519	2.7.10.2
Tyrosine-protein kinase ABL1	P00520	2.7.10.2
Proto-oncogene tyrosine-protein kinase Src	P12931	2.7.10.2
Tyrosine-protein kinase BTK	Q06187	2.7.10.2
Non-receptor tyrosine-protein kinase TYK2	P29597	2.7.10.2
Casein kinase II subunit alpha	P28523	2.7.11.1
Serine/threonine-protein kinase 24	Q9Y6E0	2.7.11.1
Serine/threonine-protein kinase haspin	Q8TF76	2.7.11.1
Casein kinase II subunit alpha'	P19784	2.7.11.1
Casein kinase II subunit alpha	P68400	2.7.11.1
RIO-type serine/threonine-protein kinase Rio1	O28471	2.7.11.1
Serine/threonine-protein kinase pim-1	P11309	2.7.11.1
Casein kinase 2	Q8IIR9	2.7.11.1
cAMP-dependent protein kinase catalytic subunit alpha	P05132	2.7.11.11
Cyclin-dependent kinase 2	P24941	2.7.11.22
Mitogen-activated protein kinase 14	Q16539	2.7.11.24
Mitogen-activated protein kinase 1	P28482	2.7.11.24
Mitogen-activated protein kinase 3	P27361	2.7.11.24
TGF-beta receptor type-1	P36897	2.7.11.30
Dual specificity protein kinase CLK1	P49759	2.7.12.1
Dual specificity tyrosine-phosphorylation-regulated kinase 2	Q92630	2.7.12.1
2-amino-4-hydroxy-6-hydroxymethyldihydropteridine pyrophosphokinase	P26281	2.7.6.3
Cytosolic sulfotransferase 18	Q9C9C9	2.8.2.38
Probable strigolactone esterase DAD2	J9U5U9	3.1.-.-
Lovastatin esterase	B6H6L7	3.1.1.-
Monoglyceride lipase	Q99685	3.1.1.23
Peptidyl-tRNA hydrolase	D0C9L6	3.1.1.29
Phospholipase A2, membrane associated	P14555	3.1.1.4
Acidic phospholipase A2 3	P60045	3.1.1.4
Basic phospholipase A2 VRV-PL-VIIIa	P59071	3.1.1.4
Platelet-activating factor acetylhydrolase	Q13093	3.1.1.47
Acyl-protein thioesterase 2	O95372	3.1.2.-
Acyl-protein thioesterase 1	O75608	3.1.2.-
Ribonuclease P protein component	Q9X1H4	3.1.26.5
Eosinophil cationic protein	P12724	3.1.27.-
Class 10 plant pathogenesis-related protein 2B	Q9LLQ2	3.1.27.-
Carboxy-terminal domain RNA polymerase II polypeptide A small phosphatase 1	Q9GZU7	3.1.3.16
sucrose-phosphate phosphatase	P74325	3.1.3.24
Tyrosine-protein phosphatase non-receptor type 1	P18031	3.1.3.48
cAMP and cAMP-inhibited cGMP 3',5'-cyclic phosphodiesterase 10A	Q9Y233	3.1.4.17
cAMP and cAMP-inhibited cGMP 3',5'-cyclic phosphodiesterase 10A	Q9QYJ6	3.1.4.17
Endochitinase B1	Q873X9	3.2.1.14
Endolysin	P00720	3.2.1.17
Lysozyme C	P00698	3.2.1.17
Beta-hexosaminidase	Q9KU37	3.2.1.52
Beta-hexosaminidase	B4EA43	3.2.1.52
Calcium-activated potassium channel subunit beta-2	Q9Y691	3.2.1.52
Endo-1,4-beta-xylanase A	P18429	3.2.1.8
ADP-ribosyl cyclase/cyclic ADP-ribose hydrolase 1	P28907	3.2.2.-
rRNA N-glycosylase	D9J2T9	3.2.2.22
Uracil-DNA glycosylase	P13051	3.2.2.27
Methionine aminopeptidase 1	P53582	3.4.11.18
Proline iminopeptidase	O32449	3.4.11.5
Kallikrein-6	Q92876	3.4.21.-
Kallikrein-5	Q9Y337	3.4.21.-
Suppressor of tumorigenicity 14 protein	Q9Y5Y6	3.4.21.109
Kallikrein-7	P49862	3.4.21.117
Chymase	P23946	3.4.21.39
Serine protease 1	P00760	3.4.21.4
Anionic trypsin-2	P00763	3.4.21.4
Trypsin-1	P35031	3.4.21.4
Trypsin-3	P35030	3.4.21.4
Complement factor D	P00746	3.4.21.46
Urokinase-type plasminogen activator	P00749	3.4.21.73
Urokinase-type plasminogen activator	P00749	3.4.21.73
Procathepsin L	P07711	3.4.22.15
Cathepsin S	P25774	3.4.22.27
Cathepsin K	P43235	3.4.22.38
Renin	P00797	3.4.23.15
Penicillopepsin-1	P00798	3.4.23.20
Endothiapepsin	P11838	3.4.23.22
Peptide deformylase	Q672W7	3.5.1.88
Beta-lactamase	P00811	3.5.2.6
Carbapenem-hydrolyzing beta-lactamase KPC	Q9F663	3.5.2.6
Beta-lactamase	B5LY47	3.5.2.6
Beta-lactamase	Q9RBQ1	3.5.2.6
Beta-lactamase	Q6XEC0	3.5.2.6
N(G),N(G)-dimethylarginine dimethylaminohydrolase 1	O94760	3.5.3.18
8-oxo-dGTP diphosphatase	P08337	3.6.1.55
Oxidized purine nucleoside triphosphate hydrolase	P36639	3.6.1.56
Oxidized purine nucleoside triphosphate hydrolase	Q7ZWC3	3.6.1.56
Heat shock protein HSP 90-alpha	P07900	3.6.4.10
Arylmalonate decarboxylase	Q05115	4.1.1.76
(S)-hydroxynitrile lyase	P52704	4.1.2.47
Enolase	A0A0X1	4.2.1.11
Scytalone dehydratase	P56221	4.2.1.94
Endonuclease III	O25323	4.2.99.18
2-succinyl-6-hydroxy-2,4-cyclohexadiene-1-carboxylate synthase	P37355	4.2.99.20
Adenylate cyclase type 10	Q96PN6	4.6.1.1
1-phosphatidylinositol phosphodiesterase	P14262	4.6.1.13
Non-secretory ribonuclease	P10153	4.6.1.18
Ribonuclease pancreatic	P61823	4.6.1.18
Guanyl-specific ribonuclease T1	P00651	4.6.1.24
Peptidyl-prolyl cis-trans isomerase A	P62937	5.2.1.8
Peptidyl-prolyl cis-trans isomerase NIMA-interacting 1	Q13526	5.2.1.8
Peptidyl-prolyl cis-trans isomerase FKBP5	Q13451	5.2.1.8
Peptidyl-prolyl cis-trans isomerase FKBP1A	P62942	5.2.1.8
Peptidyl-prolyl cis-trans isomerase F, mitochondrial	P30405	5.2.1.8
Peptidyl-prolyl cis-trans isomerase FKBP3	Q00688	5.2.1.8
Peptidyl-prolyl cis-trans isomerase	V9HWF5	5.2.1.8
Peptidyl-prolyl cis-trans isomerase FKBP2	P26885	5.2.1.8
Peptidyl-prolyl cis-trans isomerase FKBP35	Q8I4V8	5.2.1.8
Ribose-5-phosphate isomerase A	Q72J47	5.3.1.6
Steroid Delta-isomerase	P00947	5.3.3.1
Beta-phosphoglucomutase	P71447	5.4.2.6
Biotin--[acetyl-CoA-carboxylase] ligase	I6YFP0	6.3.4.15
biotin--[biotin carboxyl-carrier protein] ligase	P96884	6.3.4.15
biotin--[biotin carboxyl-carrier protein] ligase	O66837	6.3.4.15

## Sheet: Non-enzymatic
NAME	UNID	GO BIOLOGICAL PROCESS	CATEGORY
Glycine betaine/carnitine/choline-binding protein OpuCC	O32243	Amino-acid transport, Transport	Chemotaxis and metabolic transport
Leucine-specific-binding protein	P04816	Amino-acid transport, Transport	Chemotaxis and metabolic transport
Galactofuranose-binding protein YtfQ	P39325	Sugar transport, Transport	Chemotaxis and metabolic transport
D-allose-binding periplasmic protein	P39265	Sugar transport, Transport	Chemotaxis and metabolic transport
Ribose import binding protein RbsB	P02925	Chemotaxis, Sugar transport, Transport	Chemotaxis and metabolic transport
Gastrotropin	P51161	Lipid transport, Transport	Chemotaxis and metabolic transport
D-galactose/methyl-galactoside binding periplasmic protein MglB	P0AEE5	Chemotaxis, Sugar transport, Transport	Chemotaxis and metabolic transport
D-galactose/methyl-galactoside binding periplasmic protein MglB	P23905	Chemotaxis, Sugar transport, Transport	Chemotaxis and metabolic transport
Glycine betaine-binding protein OpuAC	P46922	Amino-acid transport, Transport	Chemotaxis and metabolic transport
Multiple sugar-binding periplasmic receptor ChvE	P25548	Chemotaxis	Chemotaxis and metabolic transport
Retinaldehyde-binding protein 1	P12271	Sensory transduction, Transport, Vision	Chemotaxis and metabolic transport
Galectin-3	P17931	Differentiation, Immunity, Innate immunity, mRNA processing, mRNA splicing	Immunity
Interleukin-36 gamma	Q9NZH8	Immunity, Inflammatory response, Innate immunity	Immunity
Major pollen allergen Bet v 1-A	P15494	Plant defense	Immunity
Major strawberry allergen Fra a 1-3	D0E0C7	Flavonoid biosynthesis, Plant defense	Immunity
Integrin alpha-L	P20701	Cell adhesion, Host-virus interaction, Phagocytosis	Immunity
FimH	A2IC68	Cell adhesion	Immunity
Putative Fml fimbrial adhesin FmlD	Q1RBS0	Adhesin	Immunity
Glutamate receptor ionotropic, kainate 1	P22756	Ion transport, Transport	Ion channels
Glutamate receptor ionotropic, kainate 1	P39086	Ion transport, Transport	Ion channels
Calcium-activated potassium channel subunit beta-2	Q9Y691	Ion transport, Transport	Ion channels
Heat shock protein HSP 90-alpha	Q2VPJ6		Other
Retinol-binding protein 4	P02753	Sensory transduction, Transport, Vision	Other
Odorant-binding protein	P81245	Olfaction, Sensory transduction, Transport	Other
Type 1 fimbrin D-mannose specific adhesin	P08191		Other
Thiol:disulfide interchange protein DsbA	P0AEG4		Other
Tablysin 15	F8QQG5		Other
DUF3211 domain-containing protein	Q973T5		Other
Neutrophil cytosol factor 4	Q15080		Other
Galectin-8	O00214	Autophagy	Other
Dual adapter for phosphotyrosine and 3-phosphotyrosine and 3-phosphoinositide	Q9UN19		Other
Mutual gliding-motility protein MglA	Q1DB04		Other
Female-specific histamine-binding protein 2	O77421		Other
Uncharacterized PhzA/B-like protein PA3332	Q9HYR3		Other
Lipoprotein	C6S9R8		Other
Frequenin-2	Q9VWX8		Other
ABC transporter substrate-binding protein PnrA-like domain-containing protein	Q936X6		Other
HSP90AA1	Q2VPJ6	Chaperon, protein folding	Other
Okadaic acid binding protein 2-alpha	Q2MHR1	Okadaic acid binding	Other
Bll1558	Q89U61	Biotin binding	Other
Odorant-binding protein AgamOBP7	Q7PXT9	Pheromone/odorant binding	Other
Gag protein	Q9IQV5	Retrovirus capsid protein	Other
Pheromone binding protein	Q8MTC1	Pheromone/odorant-binding	Other
Baculoviral IAP repeat-containing 7	Q6R308	Inhibitor of apoptosis (IAP)	Other
Monomine	Q09JX9	Amine-binding	Other
Abscisic acid receptor PYL10	Q8H1R0	Abscisic acid signaling pathway	Signaling and regulatory pathways
Induced myeloid leukemia cell differentiation protein Mcl-1	Q07820	Apoptosis, Differentiation	Signaling and regulatory pathways
Protein Mdm4	O15151		Signaling and regulatory pathways
Cell division protein ZipA	P77173	Cell cycle, Cell division	Signaling and regulatory pathways
DCN1-like protein 1	Q96GG9	Ubl conjugation pathway	Signaling and regulatory pathways
ADP-ribosylation factor-like protein 3	Q9WUL7	Cell cycle, Cell division, Protein transport, Transport	Signaling and regulatory pathways
Phytohormone-binding protein	G7J032	Gibberellin signaling pathway, Plant defense	Signaling and regulatory pathways
Autoinducer 2-binding protein LsrB	U5MRH9	D-xylose-binding	Signaling and regulatory pathways
Polymerase cofactor VP35	Q05127	Host-virus interaction, Inhibition of host IKBKE by virus, Inhibition of host innate immune response by virus, Inhibition of host IRF7 by virus, Inhibition of host RLR pathway by virus, Inhibition of host TBK1 by virus, Inhibition of host TLR pathway by virus, Interferon antiviral system evasion, Transcription, Viral immunoevasion, Viral RNA replication	Transcription and DNA/RNA binding
Nucleoprotein	P03418	Host-virus interaction, Inhibition of host innate immune response by virus, Inhibition of host interferon signaling pathway by virus, Inhibition of host MAVS by virus, Inhibition of host MDA5 by virus, Inhibition of host NF-kappa-B by virus, Inhibition of host PKR by virus, Inhibition of host RLR pathway by virus, Viral immunoevasion	Transcription and DNA/RNA binding
Androgen receptor	P15207	Transcription, Transcription regulation	Transcription and DNA/RNA binding
Androgen receptor	P10275	Transcription, Transcription regulation	Transcription and DNA/RNA binding
Nuclear receptor ROR-gamma	P51449	Biological rhythms, Transcription, Transcription regulation	Transcription and DNA/RNA binding
Bromodomain-containing protein 4	O60885	DNA damage, Host-virus interaction, Transcription, Transcription regulation	Transcription and DNA/RNA binding
Bromodomain-containing protein 9	Q9H8M2	Transcription, Transcription regulation	Transcription and DNA/RNA binding
Bromodomain-containing protein 9	Q9H8M2	Transcription, Transcription regulation	Transcription and DNA/RNA binding
WD repeat-containing protein 5	P61964	Host-virus interaction, Transcription, Transcription regulation	Transcription and DNA/RNA binding
Polycomb protein EED	O75530	Host-virus interaction, Transcription, Transcription regulation	Transcription and DNA/RNA binding
Protein ENL	Q03111	Transcription, Transcription regulation	Transcription and DNA/RNA binding
Albicidin resistance protein	Q8KRS7	multidrug resistance regulator	Transcription and DNA/RNA binding
Fatty acid-binding protein, adipocyte	P15090	Transport	Transport
Cellular retinoic acid-binding protein 2	P29373	Transport	Transport
Nopaline-binding periplasmic protein	P35120	Transport	Transport
Major urinary protein 1	P11588	Transport	Transport
Fatty acid-binding protein, brain	O15540	Transport	Transport
Spermidine-binding periplasmic protein SpuE	Q9I6J0	Transport, Virulence	Transport
Cellular retinoic acid-binding protein 1	P62964	Transport	Transport
Retinol-binding protein 4	P18902	Transport	Transport
Ectoine/5-hydroxyectoine-binding periplasmic protein UehA	Q5LUA7	Transport	Transport
Fatty acid-binding protein, liver	P02692	Transport	Transport
Tryparedoxin	O77404	Electron transport, Transport	Transport
Putrescine-binding periplasmic protein SpuD	Q9I6J1	Transport	Transport
Taurine-binding periplasmic protein	Q47537	Transport	Transport
Beta-lactoglobulin	P02754	Transport	Transport
14 kDa fatty acid-binding protein	P29498	Transport	Transport
Putrescine-binding periplasmic protein PotF	P31133	Transport	Transport
Fatty acid-binding protein, heart	P05413	Transport	Transport
Flavodoxin	O25776	Electron transport, Transport	Transport
Membrane lipoprotein TmpC	P29724	Transport	Transport
Hydantoin permease	D6R8X8	Transport	Transport
Peroxisomal membrane protein PEX14	Q8IEW2	Protein transport, Translocation, Transport	Transport
ABC-type Fe3+ transport system, periplasmic component	A3N294	Fe3+ transport system	Transport
Tripartite Tricarboxylate Transport subunit	Q6N446	Tricarboxylate binding	Transport
Biogenic amine-binding protein	Q86PT9	Histamine binding	Transport
Sugar ABC transporter	Q9A9V2	Carbohydrate binding	Transport
Putative major royal jelly protein	Q5WPU9	Tricarboxylate binding	Transport
Bug27 exported protein	Q7W019	Tricarboxylate binding	Transport
Cystine-binding periplasmic protein	Q92WC8	Ectoine transport	Transport
